# Supplementary material for: Particles’ Organization in Direct Oil-in-Water and Reverse Water-in-Oil Pickering Emulsions
Source: MDPI journal article supplement (doi:10.3390/nano13030371), 2023-01-17
Supplement: s1 [file s1]

## Particles' Organization in Direct Oil-in-Water and Reverse Water-in-Oil Pickering Emulsions

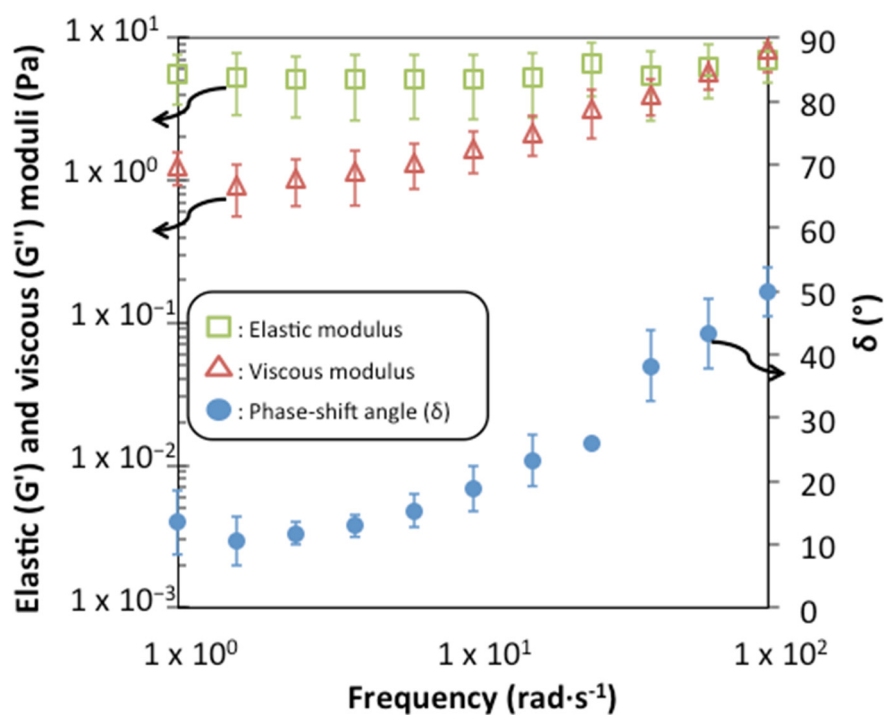

**Figure S1.** Evolution of the elastic ( $G'$ ) and viscous ( $G''$ ) modulus of suspension of silica particles dispersed in dodecane as a function of the oscillatory frequency. The symbol  $\delta$  corresponds to the phase-shift angle. The silica content is equal to 4 wt.%.

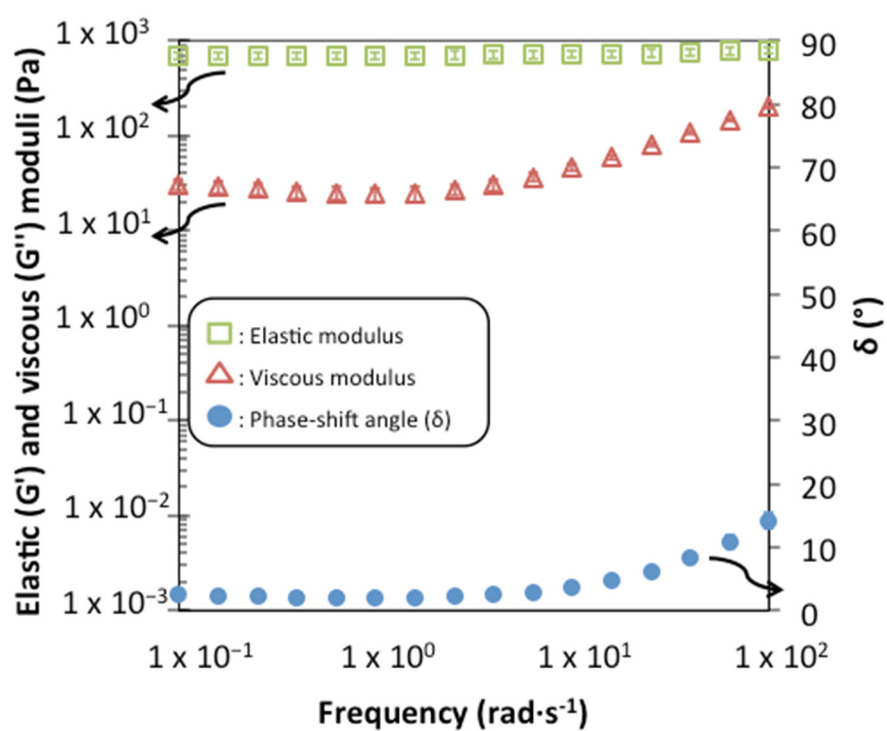

**Figure S2.** Evolution of the elastic ( $G'$ ) and viscous ( $G''$ ) modulus of suspension of silica particles dispersed in paraffin as a function of the oscillatory frequency. The symbol  $\delta$  corresponds to the phase-shift angle. The silica content is equal to 4 wt.%.

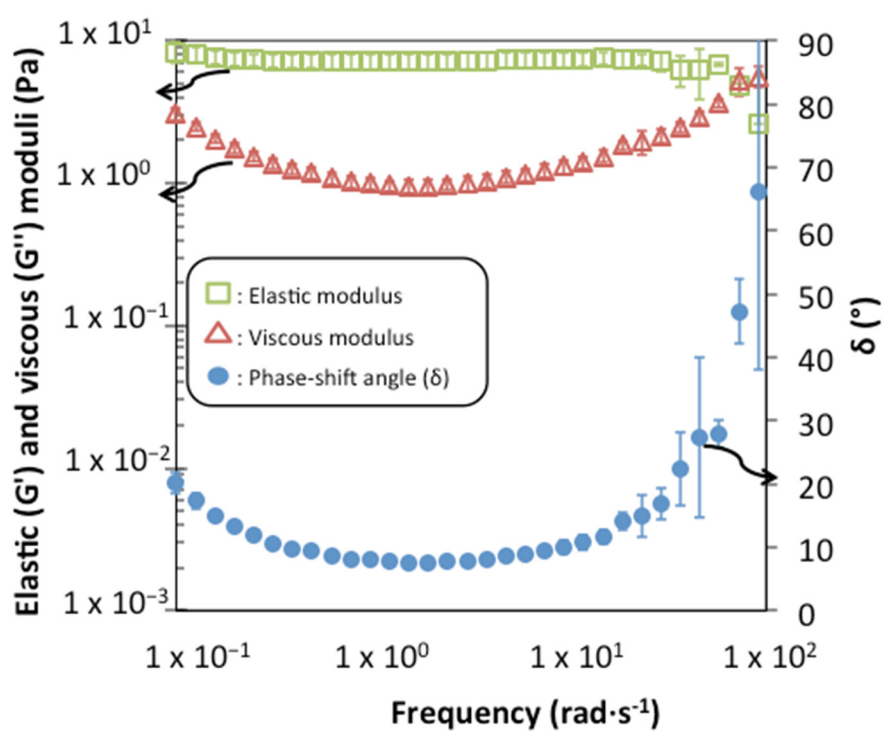

**Figure S3.** Evolution of the elastic ( $G'$ ) and viscous ( $G''$ ) modulus of suspension of silica particles dispersed in a 2 % brine of NaCl as a function of the oscillatory frequency. The symbol  $\delta$  corresponds to the phase-shift angle. The silica content is equal to 4 wt.%.

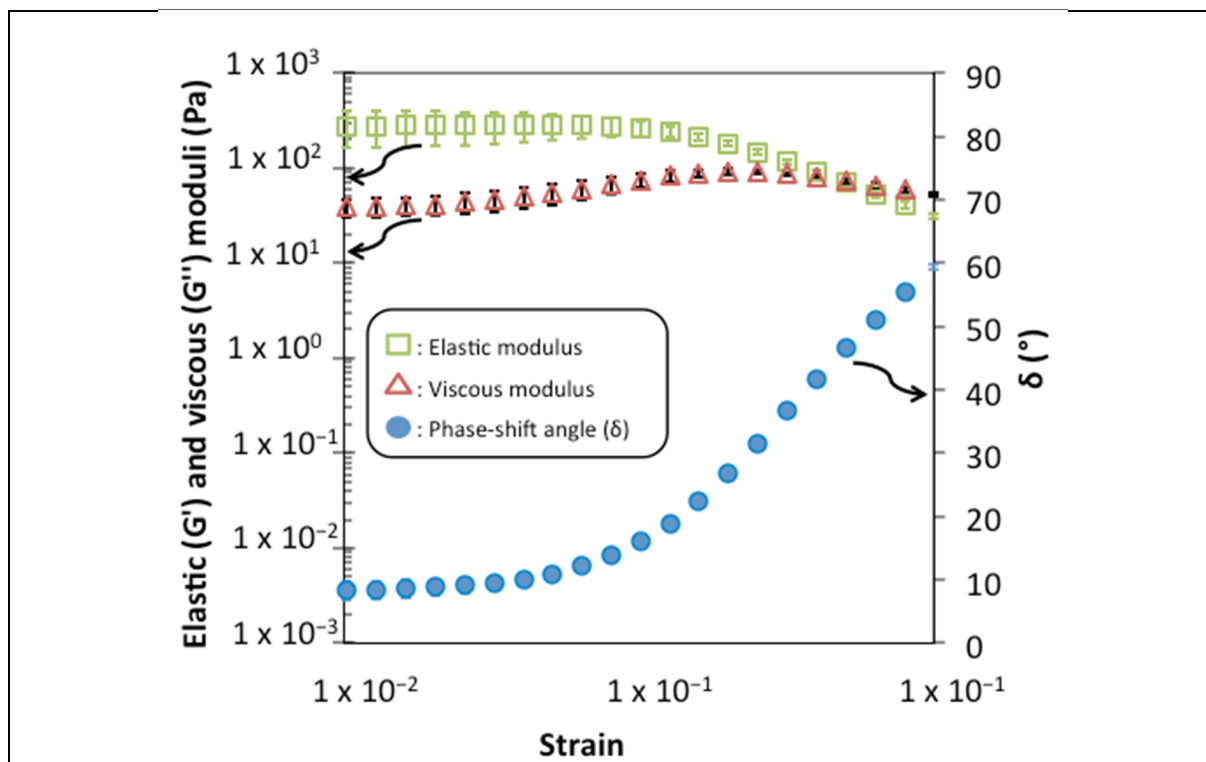

**Figure S4.** Evolution of the elastic ( $G'$ ) and viscous ( $G''$ ) modulus of suspension of silica particles dispersed in paraffin as a function of shear strain ( $\gamma$ ). The symbol  $\delta$  corresponds to the phase-shift angle. The silica content is equal to 4 wt.%.

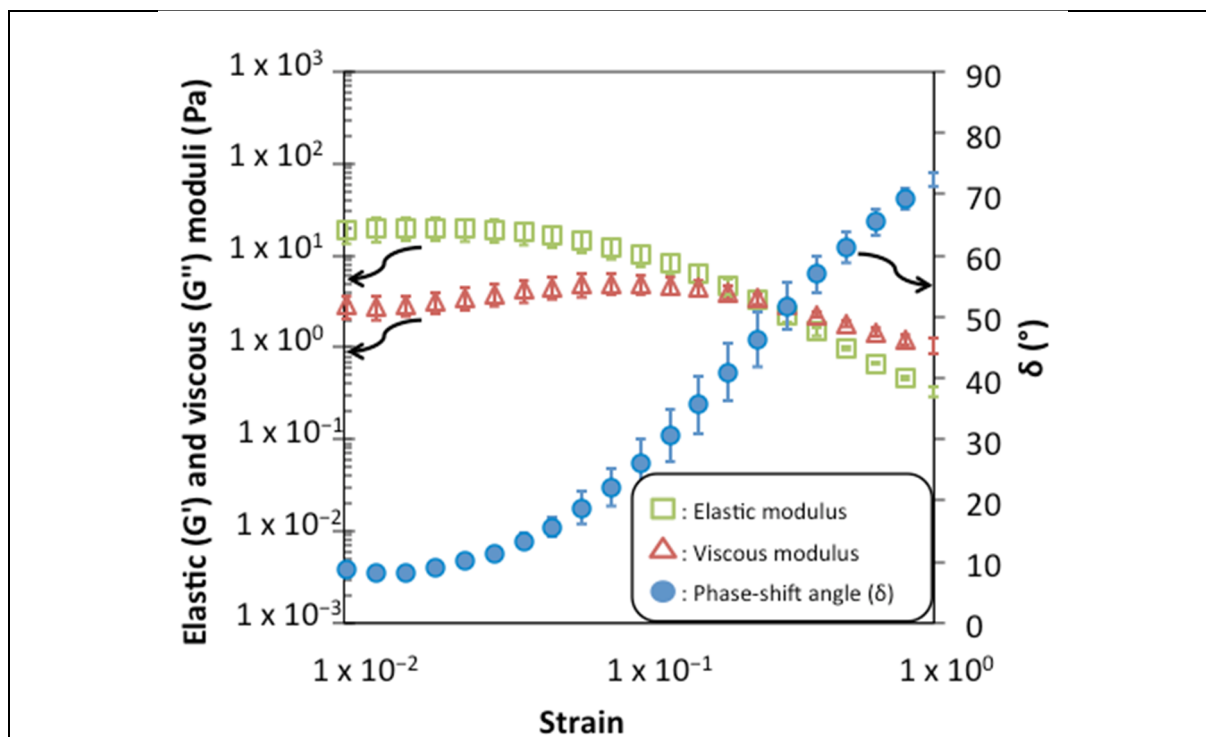

**Figure S5.** Evolution of the elastic ( $G'$ ) and viscous ( $G''$ ) modulus of suspension of silica particles dispersed in dodecane as a function of shear strain. The silica content is equal to 4 wt.%.

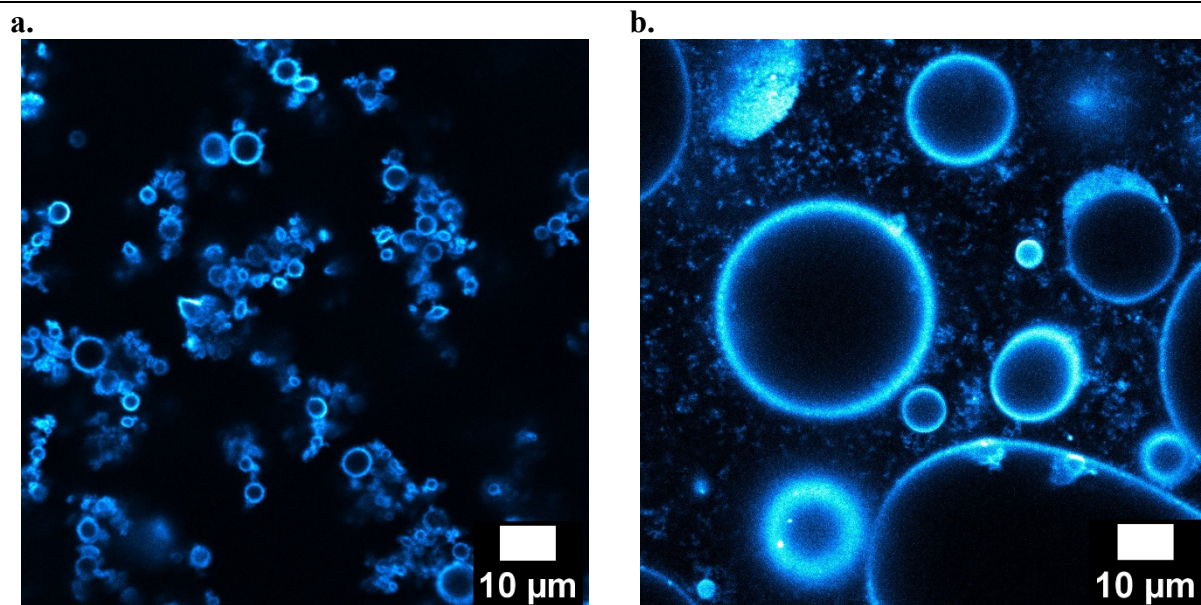

**Figure S6.** Confocal fluorescence images of (a) reverse and (b) direct emulsions prepared with paraffin oil and 1 wt.% of partially hydrophobic silica particles.

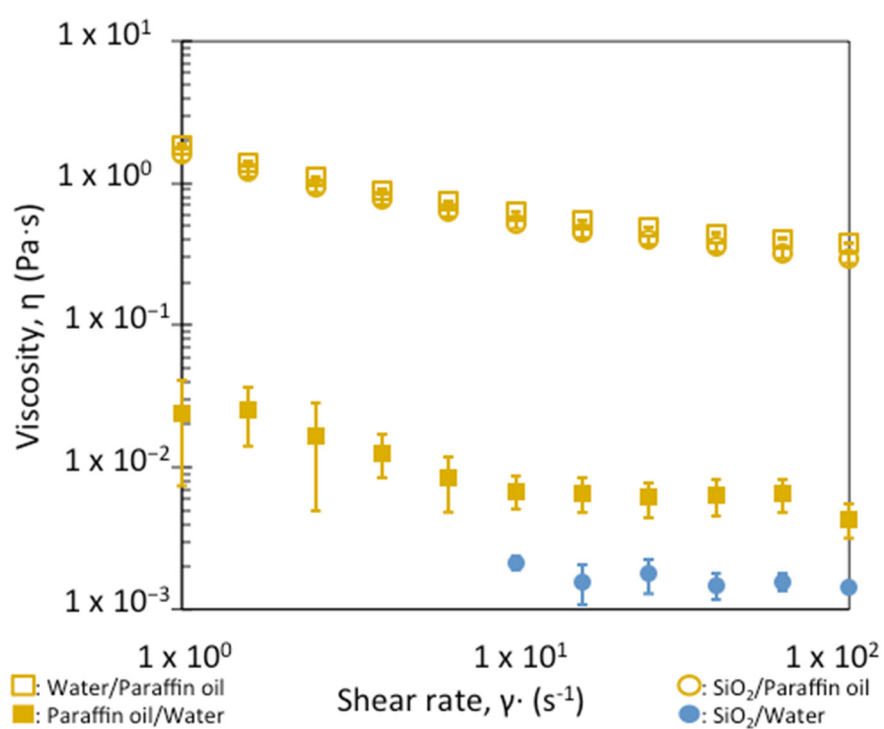

**Figure S7.** Comparison of the rheological behavior of reverse and direct emulsions prepared with paraffin oil and 1 wt.% of partially hydrophobic silica particles. Flow curves showing the viscosity ( $\eta$ ) as a function of the shear rate ( $\dot{\gamma}$ ).

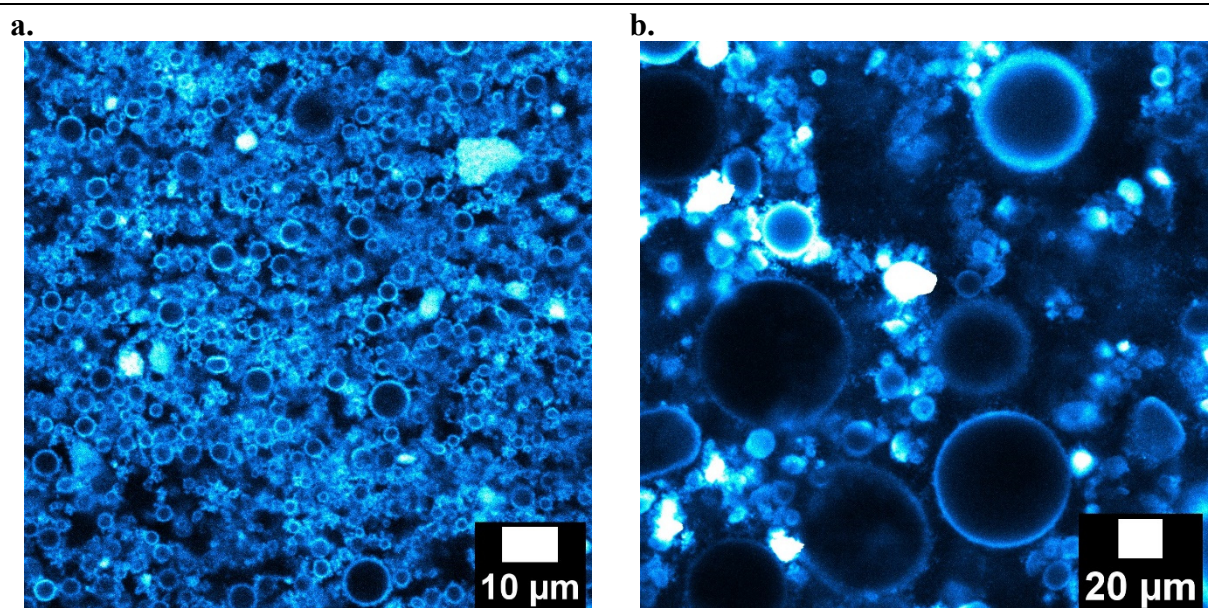

**Figure S8.** Confocal fluorescence images of (a) reverse and (b) direct emulsions prepared with paraffin oil and 4 wt.% of partially hydrophobic silica particles.



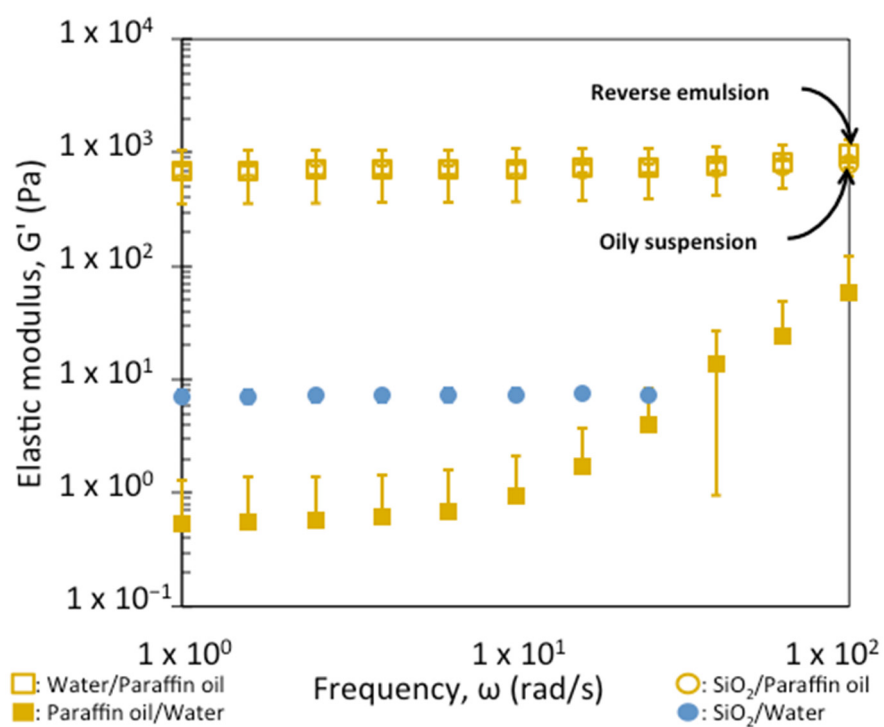

**Figure S9.** Comparison of the rheological behavior of reverse and direct emulsions prepared with paraffin oil and 4 wt.% of partially hydrophobic silica particles. Mechanical spectra showing the elastic modulus ( $G'$ ) as a function of frequency ( $\omega$ ).
